# Supplementary figures and images for: Nutritional Component Analyses in Different Varieties of Actinidia eriantha Kiwifruit by Transcriptomic and Metabolomic Approaches
Source: MDPI journal article supplement (doi:10.3390/ijms231810217), 2022-09-06

Figure S1

a

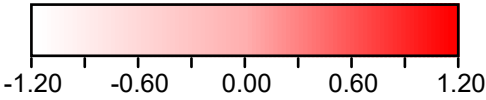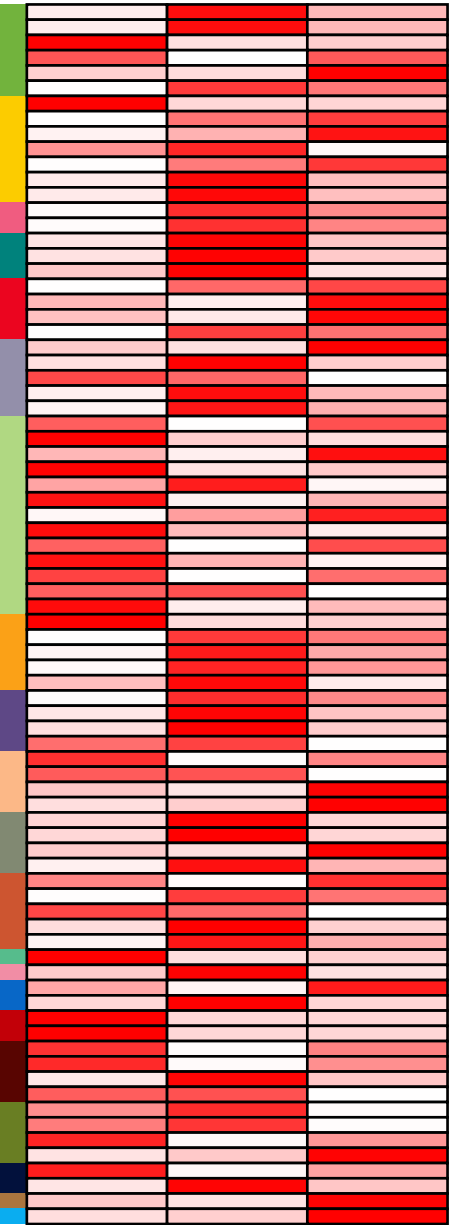

MM-11 MM-13 MM-16

b

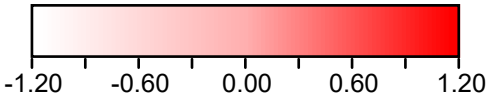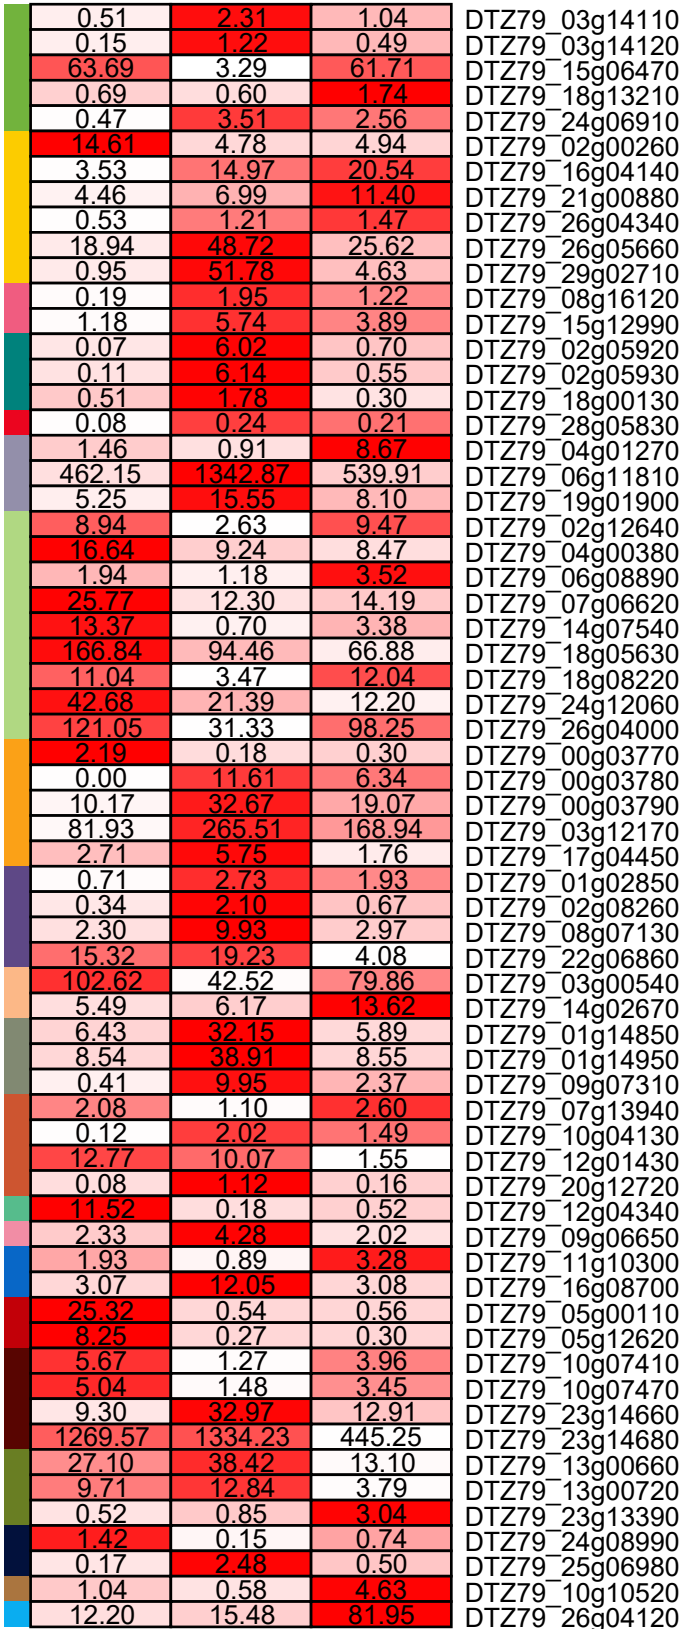

MM-11 MM-13 MM-16

Figure S2

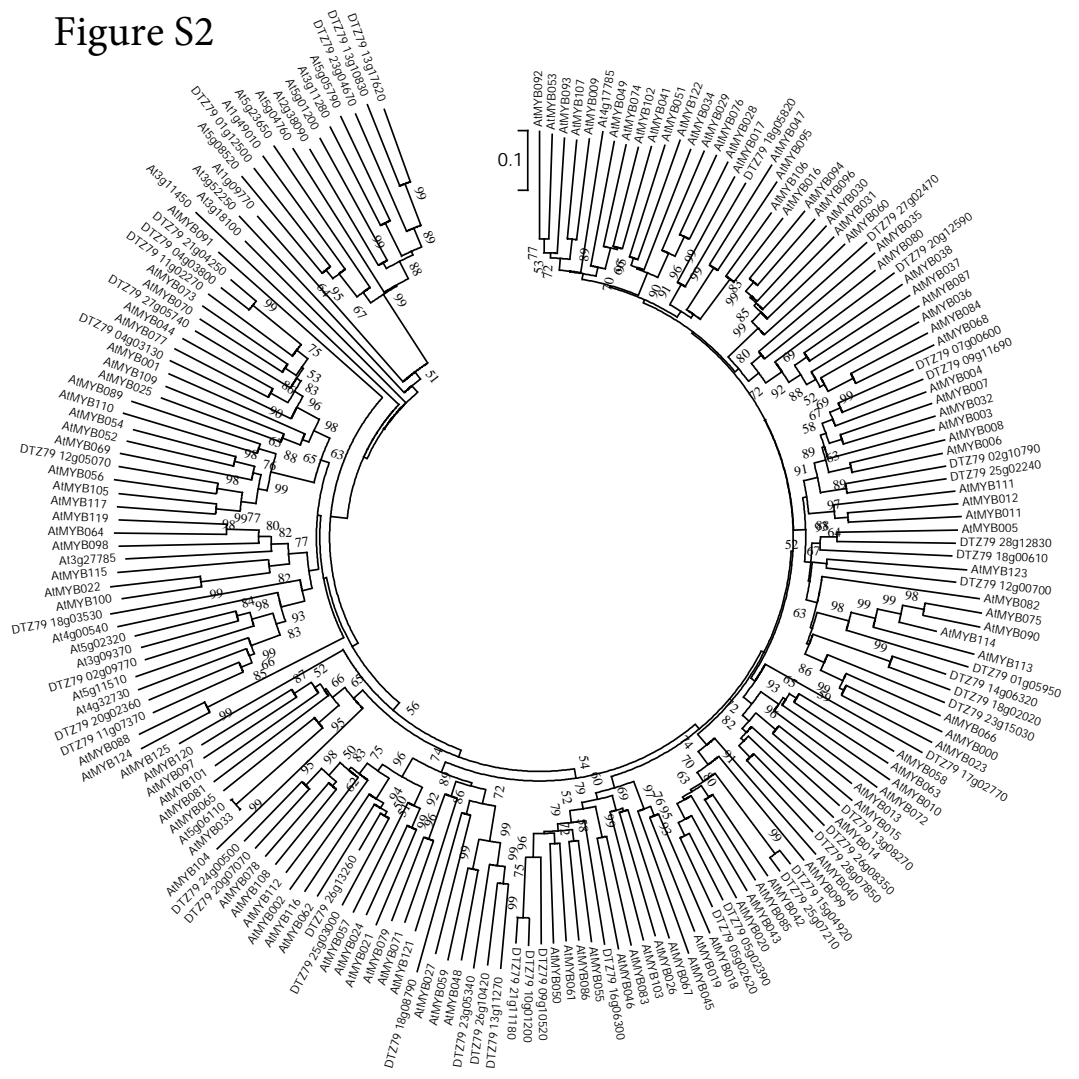



Figure S4

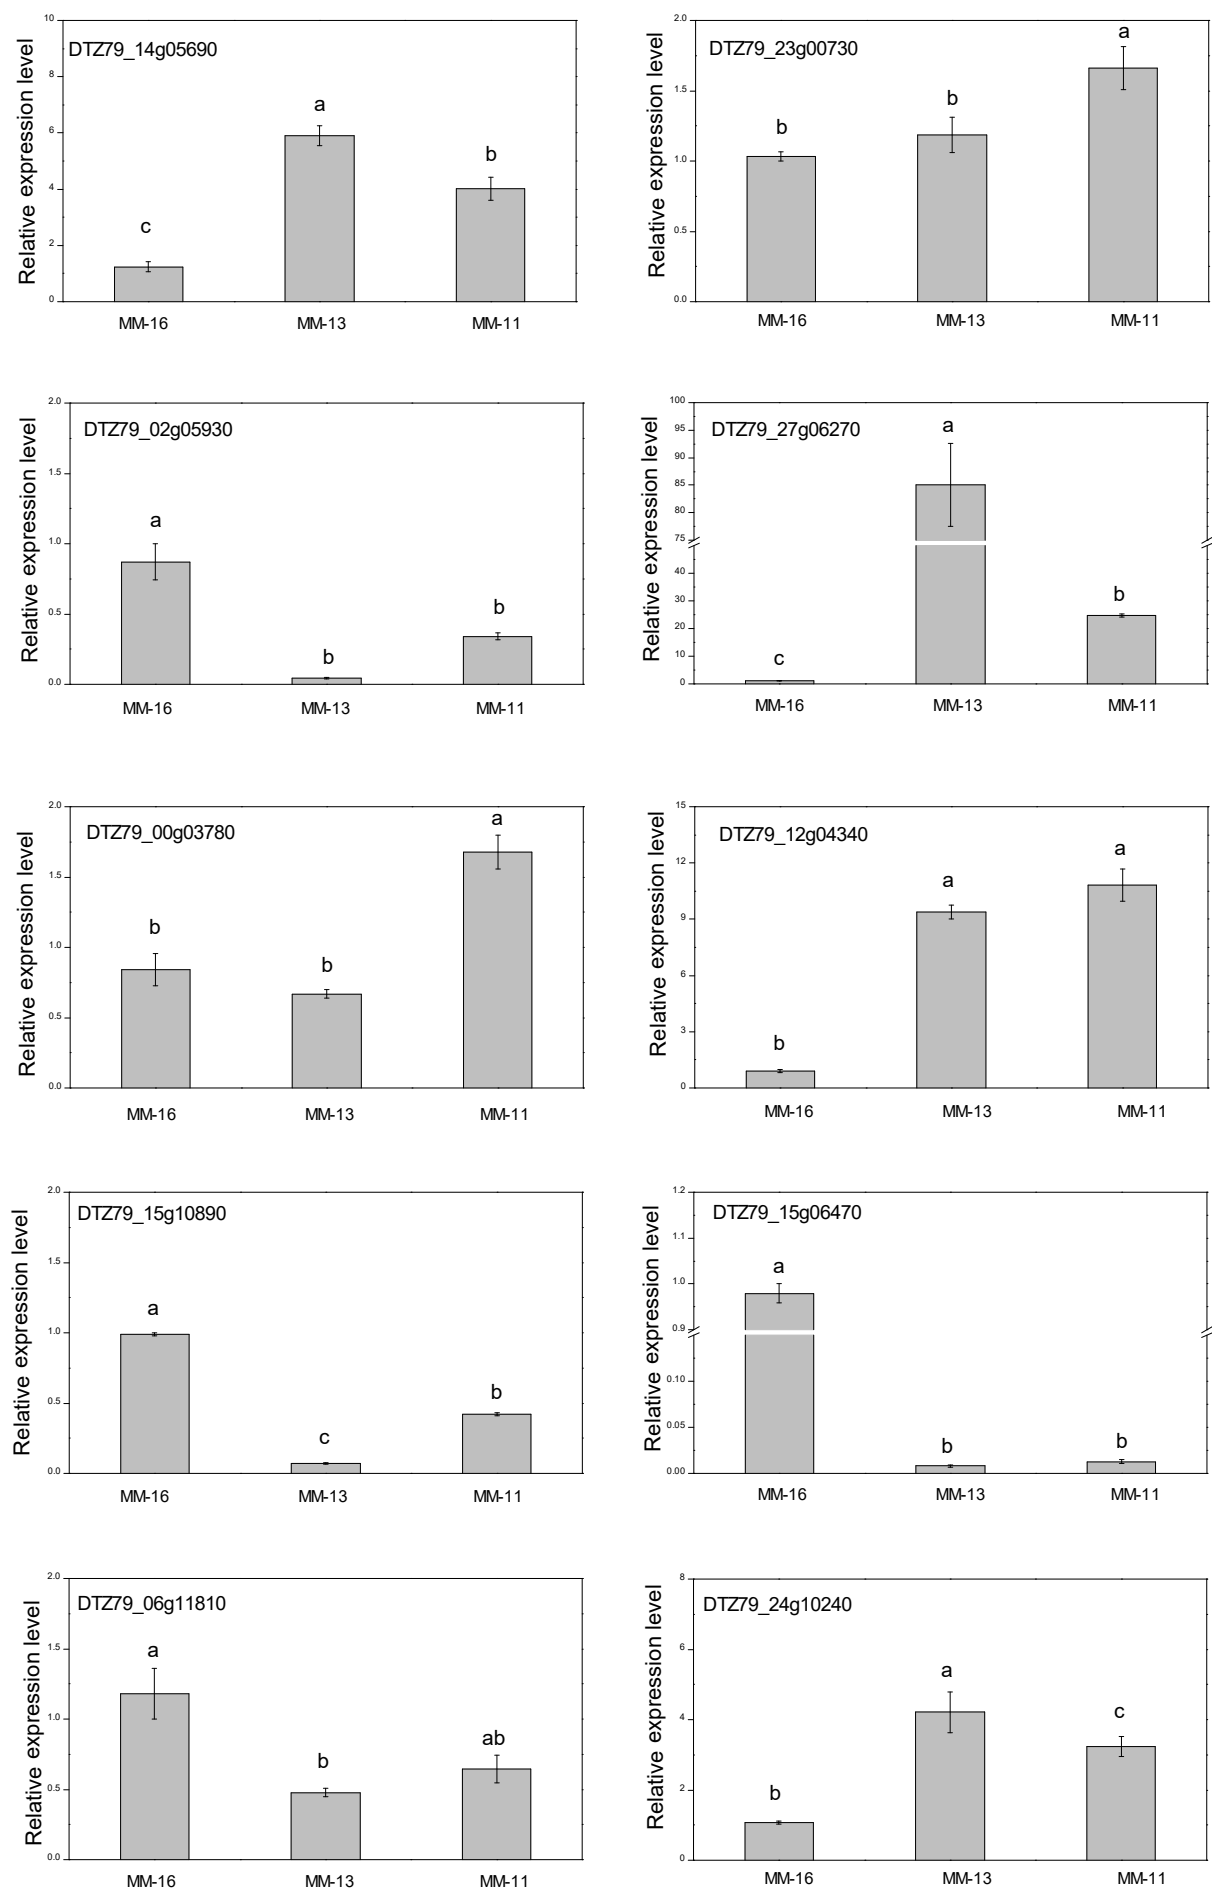

Supplement: s1 [file s1]
